# Supplementary material for: Cancer Cell enters reversible quiescence through Intracellular Acidification to resist Paclitaxel Cytotoxicity
Source: Int J Med Sci. 2020 Jun 29;17(11):1652–64. doi: 10.7150/ijms.46034 (PMC7359388; doi:10.7150/ijms.46034)
Supplement: Supplementary file 1 — Supplementary figures and tables. [file ijmsv17p1652s1.pdf]

**Table 1 Primers for real-time PCR**

| Gene Name      | Forward(5'-3')          | Reverse(5'-3')          |
|----------------|-------------------------|-------------------------|
| CD44           | CTGCCGCTTTGCAGGTGTA     | CATTGTGGGCAAGGTGCTATT   |
| NANOG          | AAGGTCCCGGTCAAGAAACAG   | CTTCTGCGTCACACCATTGC    |
| OCT4           | CTGGGTTGATCCTCGGACCT    | CCATCGGAGTTGCTCTCCA     |
| ABCG2          | CAGGTGGAGGCAAATCTTCGT   | ACCCTGTTAATCCGTTTCGTTTT |
| ABCC1          | CTCTATCTCTCCCGACATGACC  | AGCAGACGATCCACAGCAAAA   |
| ABCB1          | TTGCTGCTTACATTCAGGTTTCA | AGCCTATCTCCTGTCGCATTA   |
| TOP2B          | AGCCATTGACGCAGTTCATGT   | CCTGGCACAAAGGTAACCTCC   |
| GSTK1          | TCTGGAAAAGATCGCAACGC    | GCCCAAAGGCTCCGTATCTG    |
| $\beta$ -actin | ACAGAGCCTCGCCTTTGC      | GCGGCGATATCATCATCC      |

| Type      | PTX (nM)         | Cisplatin ( $\mu\text{g/ml}$ ) | Vincristine (nM) |
|-----------|------------------|--------------------------------|------------------|
| HepG2     | 21.56 $\pm$ 1.17 | 2.42 $\pm$ 1.15                | 60.64 $\pm$ 1.46 |
| Quiescent | 3185 $\pm$ 1.94  | 2.42 $\pm$ 1.03                | 1848 $\pm$ 1.42  |
| Reac      | 839.7 $\pm$ 1.09 | 1.86 $\pm$ 1.01                | 794.8 $\pm$ 1.37 |
| UMUC-3    | 290.1 $\pm$ 1.06 | 4.48 $\pm$ 1.32                | 0.89 $\pm$ 1.22  |
| Quiescent | > 5000           | 10.67 $\pm$ 1.13               | 16.83 $\pm$ 1.38 |
| Reac      | 4769 $\pm$ 2.10  | 14.23 $\pm$ 1.17               | 45.36 $\pm$ 1.92 |

**Figure S1. long-term PTX treatment induces multiple anti-cancer drugs** HepG2 and UMUC-3 Cells were treated with indicative anti-cancer drugs (PTX, vincristine and cisplatin) for 2 days; cell viability was valued by MTS assay. The data are shown as IC<sub>50</sub> (mean  $\pm$ SD of three independent experiments).

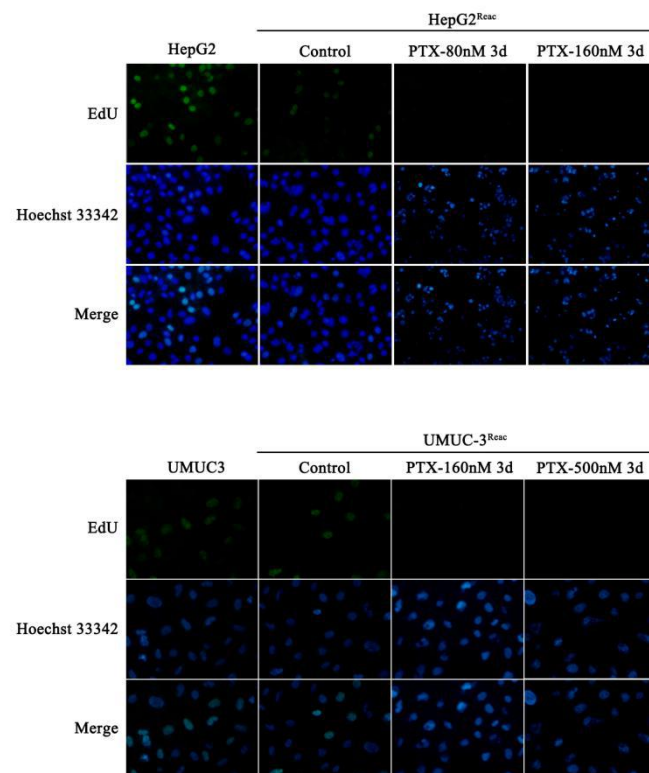

**Figure S2. Higher doses of PTX readily induces quiescence of the reactivated cells.** The reactivated cells were treated with indicative concentration of PTX for 3 days, immunofluorescence staining was performed to detect EdU (green) and nucleuses were visualized by Hoechst33342 staining (blue).

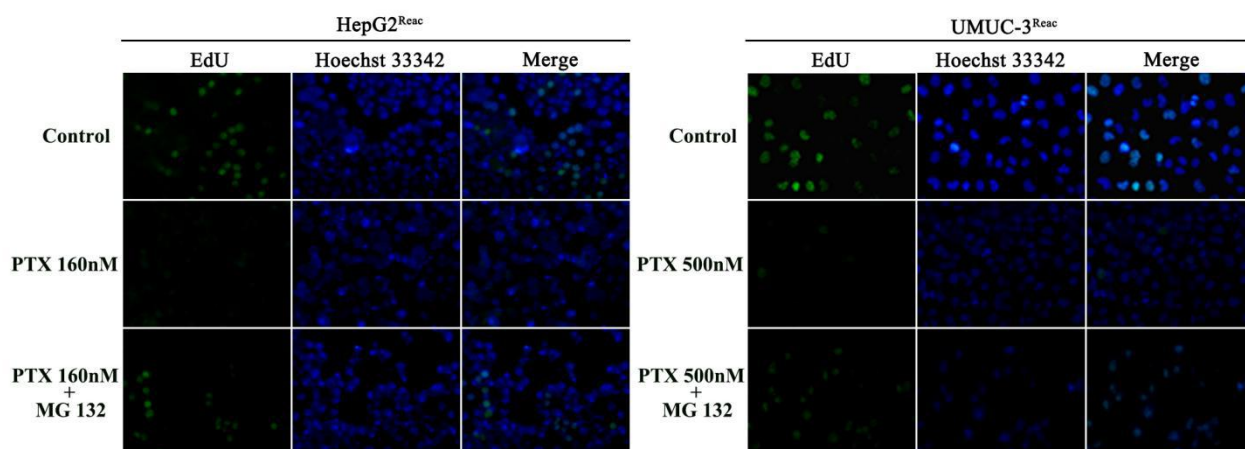

**Figure S3. MG132 inhibits reactivated cell entering quiescence.** The reactivated cells were treated with high dose of PTX (HepG2<sup>Reac</sup> 160nM, UMUC3<sup>Reac</sup> 500nM) combined with or without 1μM MG132 for 24h, immunofluorescence staining was performed to detect EdU (green) and nucleuses were visualized by Hoechst33342 staining (blue).

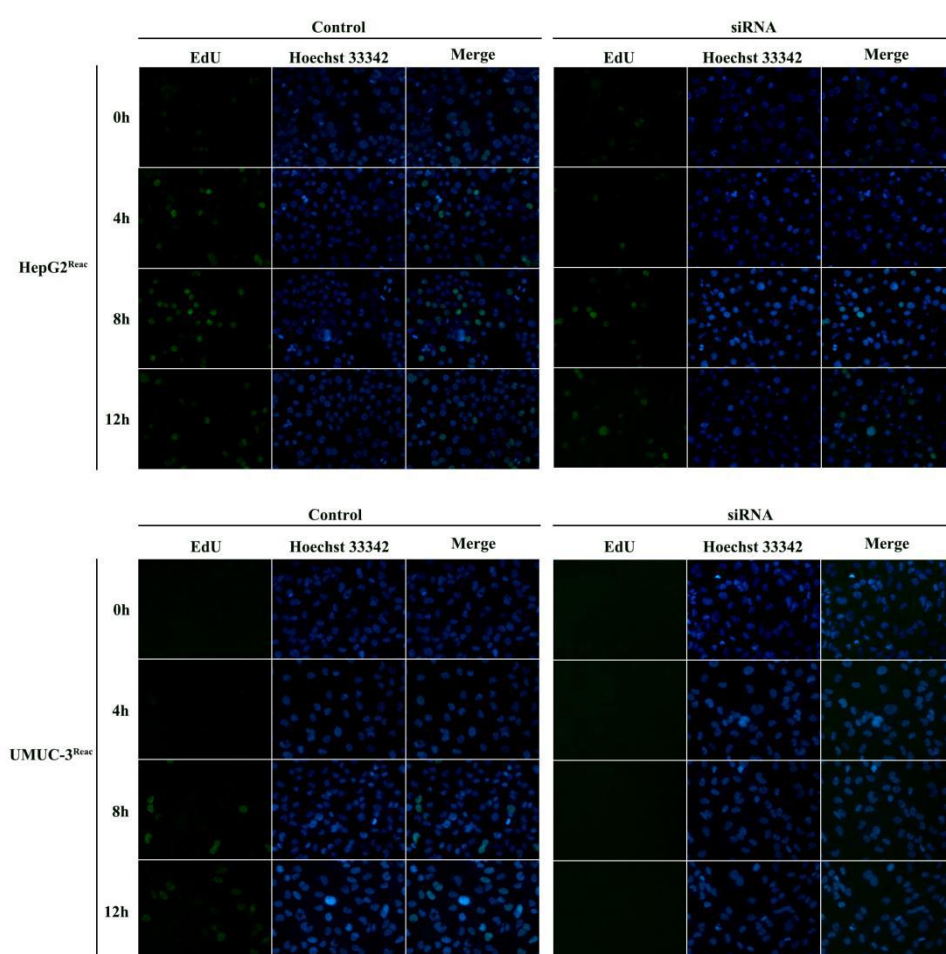

**Figure S4. MCM7 siRNA inhibits the reactivation of quiescent reacted cells.** The reactivated cells were treated with PTX (160nM for HepG2<sup>Reac</sup>, 500nM for UMUC-3<sup>Reac</sup>) for 3 days to induce quiescence and then released into fresh medium, MCM7 siRNA was transfected 24h before the PTX-release, cells were collected at 0h, 4h, 8h and 12h after the PTX-release, immunofluorescence staining was performed to detect EdU (green) and nucleuses were visualized by Hoechst33342 staining (blue).
